# Supplementary material for: iBitter-Fuse: A Novel Sequence-Based Bitter Peptide Predictor by Fusing Multi-View Features
Source: MDPI journal article supplement (doi:10.3390/ijms22168958), 2021-08-19
Supplement: s1 [file s1]

PAAC descriptor (or the type 1 PAAC) consists of  $20 + \lambda$  discrete features [1], where the first 20 features are the classical AAC descriptor and sequence order-correlated factors are defined as follows:

$$\left\{ \begin{array}{l} \theta_1 = \frac{1}{N-1} \sum_{i=1}^{N-1} \Theta(R_i, R_{i+1}) \\ \theta_2 = \frac{1}{N-2} \sum_{i=1}^{N-2} \Theta(R_i, R_{i+2}) \\ \theta_3 = \frac{1}{N-3} \sum_{i=1}^{N-3} \Theta(R_i, R_{i+3}) \\ \dots \\ \theta_\lambda = \frac{1}{N-1} \sum_{i=1}^{N-\lambda} \Theta(R_i, R_{i+\lambda}) \end{array} \right. \quad (1)$$

where  $\lambda$  ( $\lambda < L$ ) is a parameter to be specified and  $L$  is the protein/peptide length. Meanwhile,  $\theta_1$  is the 1<sup>st</sup> rank coupling factor encoding the sequence-order correlation between all the most contiguous residues along a protein chain,  $\theta_2$  is the 2<sup>nd</sup> rank coupling factor encoding the sequence-order correlation between all the 2<sup>nd</sup> most contiguous residues,  $\theta_3$  is the 3<sup>rd</sup> rank coupling factor encoding the sequence-order correlation between all the 3<sup>rd</sup> most contiguous residues and so forth. And  $\Theta(R_i, R_j)$ , which is a set of  $N$  amino acid properties, it can be defined as: where  $H_k(R_i)$  is the  $k^{th}$  property in the amino acid property set for amino acid  $R_i$ , can be represented by

$$\Theta(R_i, R_j) = \frac{1}{N} \sum_{K=1}^N [H_k(R_i) - H_k(R_j)]^2 \quad (2)$$

where  $H_k(R_i)$  is the  $k^{th}$  property in the amino acid property set for amino acid  $R_i$ , defined as follows:

$$H_k(R_i) = \frac{H_k^o - \frac{1}{20} \sum_{i=1}^{20} H_k^o(R_i)}{\sqrt{\frac{\sum_{i=1}^{20} [H_k^o(R_i) - \frac{1}{20} \sum_{i=1}^{20} H_k^o(R_i)]^2}{20}}} \quad (3)$$

Where  $H_1^o$ ,  $H_2^o$  and  $H_3^o$  represent hydrophobicity value, hydrophilicity value and side chain mass, respectively, of the amino acid. Let  $f_i$  is the normalized frequency of natural 20 amino acids in the protein sequence. Thus, a set of the  $20 + \lambda$  discrete features or PAAC can be defines as:

$$P = \begin{bmatrix} x_1 \\ x_2 \\ \dots \\ x_{20} \\ x_{20+1} \\ \dots \\ x_{20+\lambda} \end{bmatrix} \quad (4)$$

$$x_c = \frac{f_c}{\sum_r^{20} f_r + \omega \sum_j^\lambda \theta_j} \quad (1 < c < 20) \quad (5)$$

$$x_c = \frac{\omega \theta_{c-20}}{\sum_r^{20} f_r + \omega \sum_j^\lambda \theta_j} \quad (21 < c < 20 + \lambda) \quad (6)$$

where  $\theta_j$  is the  $j^{th}$  rank sequence-coupling factor based on Eqs. (1) and (3) and  $f_i$  ( $i = 1, 2, \dots, 20$ ) is the normalized frequency of natural 20 amino acids in the protein sequence. The  $\lambda$  and  $\omega$  are important of PAAC descriptor.

APAAC descriptor is known as the type 2 PAAC [1] and its definition is similar to the PAAC descriptor. As mentioned above,  $H_1^o$  and  $H_2^o$  represent hydrophobicity value and hydrophilicity value, and the hydrophobicity and hydrophilicity correlation functions are defined as:

$$H_{i,j}^1 = H_1(i)H_1(j) \quad (7)$$

$$H_{i,j}^2 = H_2(i)H_2(j) \quad (8)$$

The sequence order-correlated factors are defined as follows:

$$\left\{ \begin{array}{l} \tau_1 = \frac{1}{N-1} \sum_{i=1}^{N-1} H_{i,i+1}^1 \\ \tau_2 = \frac{1}{N-1} \sum_{i=1}^{N-1} H_{i,i+1}^2 \\ \tau_3 = \frac{1}{N-2} \sum_{i=1}^{N-2} H_{i,i+2}^1 \\ \tau_4 = \frac{1}{N-2} \sum_{i=1}^{N-2} H_{i,i+2}^2 \\ \dots \\ \dots \\ \tau_{2\lambda-1} = \frac{1}{N-\lambda} \sum_{i=1}^{N-\lambda} H_{i,i+\lambda}^1 \\ \tau_{2\lambda} = \frac{1}{N-\lambda} \sum_{i=1}^{N-\lambda} H_{i,i+\lambda}^2 \end{array} \right. \quad (9)$$

APAAC descriptor is represented with a set of the  $20 + 2\lambda$  discrete features, defined as follows:

$$P = \begin{bmatrix} x_1 \\ x_2 \\ \dots \\ x_{20} \\ x_{20+1} \\ \dots \\ x_{20+\lambda} \\ x_{20+\lambda+1} \\ x_{20+\lambda+2} \\ \dots \\ x_{20+2\lambda} \end{bmatrix} \quad (10)$$

$$x_c = \frac{f_c}{\sum_r^{20} f_r + \omega \sum_j^{2\lambda} \tau_j} \quad (1 < c < 20) \quad (11)$$

$$x_c = \frac{w\tau_{c-20}}{\sum_r^{20} f_r + \omega \sum_j^{2\lambda} \tau_j} \quad (21 < c < 20 + 2\lambda) \quad (12)$$

where  $f_i$  ( $i = 1, 2, \dots, 20$ ) is the normalized frequency of natural 20 amino acids in the protein sequence,  $\tau_j$  the  $j$ -tier sequence-correlation factor computed according to Eq. (9) and  $\omega$  is important of APAAC descriptor.

**Table S1.** Hyperparameter search details for six popular ML algorithms.

| Method | Parameters                            | Range of parameters                                  |
|--------|---------------------------------------|------------------------------------------------------|
| ETree  | n_estimators                          | [20, 50, 100, 200, 500]                              |
| LR     | C                                     | [0.001, 0.01, 0.1, 1, 10, 100, 1000]                 |
| MLP    | hidden_layer_sizes                    | [1.0, 2.0, 4.0, 8.0, 16.0, 32.0, 64.0, 128.0, 256.0] |
| RF     | n_estimators                          | [20, 50, 100, 200, 500]                              |
|        | max_features                          | sqrt(n_features)                                     |
| SVM    | penalty parameter ( $C^{[a]}$ )       | $[2^{-2}-2^2]$ in $\log_2$ steps                     |
|        | kernel coefficient ( $\gamma^{[a]}$ ) | $[2^{-2}-2^2]$ in $\log_2$ steps                     |
| XGB    | n_estimators                          | [20, 50, 100, 200, 500]                              |

Columns 2 and 3 represent the parameter name used in the Scikit-learn library and the range of parameter used to develop the model, respectively.

**Table S2.** Performance comparison of our proposed multi-view features with five well-known feature descriptors.

| Cross-validation | Feature | #Feature | ACC   | Sn    | Sp    | MCC   | AUC   |
|------------------|---------|----------|-------|-------|-------|-------|-------|
| 10-fold CV       | Fusion  | 36       | 0.918 | 0.918 | 0.918 | 0.837 | 0.937 |
|                  | AAC     | 20       | 0.830 | 0.804 | 0.856 | 0.662 | 0.893 |
|                  | DPC     | 400      | 0.781 | 0.790 | 0.773 | 0.565 | 0.853 |
|                  | PAAC    | 21       | 0.842 | 0.840 | 0.844 | 0.687 | 0.891 |
|                  | APAAC   | 22       | 0.804 | 0.757 | 0.852 | 0.614 | 0.870 |
|                  | AAI     | 531      | 0.838 | 0.812 | 0.864 | 0.681 | 0.894 |
| Independent test | Fusion  | 36       | 0.930 | 0.938 | 0.922 | 0.859 | 0.933 |
|                  | AAC     | 20       | 0.867 | 0.859 | 0.875 | 0.734 | 0.925 |
|                  | DPC     | 400      | 0.852 | 0.781 | 0.922 | 0.710 | 0.902 |
|                  | PAAC    | 21       | 0.898 | 0.891 | 0.906 | 0.797 | 0.925 |
|                  | APAAC   | 22       | 0.875 | 0.875 | 0.875 | 0.750 | 0.933 |
|                  | AAI     | 531      | 0.891 | 0.891 | 0.891 | 0.781 | 0.942 |

**Table S3** Summary information of the selected 36 informative features derived from GA-SAR.

| Feature    | Type of Descriptor | Description                                                                     |
|------------|--------------------|---------------------------------------------------------------------------------|
| I          | AAC                | Frequency of I presenting in a protein sequence                                 |
| K          | AAC                | Frequency of K presenting in a protein sequence                                 |
| W          | AAC                | Frequency of W presenting in a protein sequence                                 |
| Y          | AAC                | Frequency of Y presenting in a protein sequence                                 |
| AA         | DPC                | Frequency of AA presenting in a protein sequence                                |
| AF         | DPC                | Frequency of AF presenting in a protein sequence                                |
| EL         | DPC                | Frequency of EL presenting in a protein sequence                                |
| GV         | DPC                | Frequency of GV presenting in a protein sequence                                |
| IA         | DPC                | Frequency of IA presenting in a protein sequence                                |
| IQ         | DPC                | Frequency of IQ presenting in a protein sequence                                |
| KG         | DPC                | Frequency of KG presenting in a protein sequence                                |
| LE         | DPC                | Frequency of LE presenting in a protein sequence                                |
| LQ         | DPC                | Frequency of LQ presenting in a protein sequence                                |
| PF         | DPC                | Frequency of PF presenting in a protein sequence                                |
| QL         | DPC                | Frequency of QL presenting in a protein sequence                                |
| TD         | DPC                | Frequency of TP presenting in a protein sequence                                |
| YG         | DPC                | Frequency of YG presenting in a protein sequence                                |
| Xc1.P      | PAAC               | Frequency of P presenting in a protein sequence                                 |
| BIGC670101 | AAI                | Residue volume (Bigelow, 1967)                                                  |
| DESM900101 | AAI                | Hydrophobicity index, 3.0 pH (Cowan-Whittaker, 1990)                            |
| FAUJ880106 | AAI                | STERIMOL maximum width of the side chain (Fauchere et al., 1988)                |
| FAUJ880110 | AAI                | Number of full nonbonding orbitals (Fauchere et al., 1988)                      |
| GOLD730101 | AAI                | Hydrophobicity factor (Goldsack-Chalifoux, 1973)                                |
| GRAR740102 | AAI                | Polarity (Grantham, 1974)                                                       |
| NAKH900113 | AAI                | Ratio of average and computed composition (Nakashima et al., 1977)              |
| OOBM770104 | AAI                | Average non-bonded energy per residue (Oobatake-Ooi, 1977)                      |
| QIAN880129 | AAI                | Weights for coil at the window position of -4 (Qian-Sejnowski, 1980)            |
| VENT840101 | AAI                | Bitterness (Venanzi, 1984)                                                      |
| WERD780102 | AAI                | Free energy change of epsilon(i) to epsilon(ex) (Wertz-Scheraga, 1978)          |
| WOLS870103 | AAI                | Principal property value z3 (Wold et al., 1987)                                 |
| YUTK870102 | AAI                | Unfolding Gibbs energy in water, pH9.0 (Yutani et al., 1987)                    |
| ZIMJ680103 | AAI                | Polarity (Zimmerman et al., 1968)                                               |
| MUNV940105 | AAI                | Free energy in beta-strand region (Munoz-Serrano, 1994)                         |
| TAKK010101 | AAI                | Side-chain contribution to protein stability (kJ/mol) (Takano-Yutani, 2001)     |
| CEDJ970102 | AAI                | Composition of amino acids in anchored proteins (percent) (Cedano et al., 1997) |
| HARY940101 | AAI                | Mean volumes of residues buried in protein interiors (Harpaz et al., 1994)      |

**Table S4** Cross-validation results of ML-based classifiers built eight ML methods with three feature descriptors.

| <b>Descriptor</b> | <b>Classifier</b> | <b>Parameter</b> | <b>ACC</b> | <b>Sn</b> | <b>Sp</b> | <b>MCC</b> | <b>AUC</b> |
|-------------------|-------------------|------------------|------------|-----------|-----------|------------|------------|
| AAC               | DT                | N/A              | 0.779      | 0.816     | 0.742     | 0.563      | 0.781      |
|                   | ETree             | 50               | 0.846      | 0.847     | 0.844     | 0.697      | 0.903      |
|                   | KNN               | N/A              | 0.762      | 0.836     | 0.688     | 0.537      | 0.762      |
|                   | LR                | 100              | 0.781      | 0.789     | 0.774     | 0.565      | 0.824      |
|                   | MLP               | 300              | 0.830      | 0.847     | 0.813     | 0.664      | 0.882      |
|                   | NB                | N/A              | 0.627      | 0.933     | 0.320     | 0.325      | 0.817      |
|                   | RF                | 500              | 0.853      | 0.847     | 0.860     | 0.710      | 0.912      |
|                   | XGB               | 100              | 0.828      | 0.836     | 0.821     | 0.661      | 0.898      |
| PAAC              | DT                | N/A              | 0.734      | 0.796     | 0.672     | 0.476      | 0.742      |
|                   | ETree             | 300              | 0.850      | 0.851     | 0.848     | 0.704      | 0.909      |
|                   | KNN               | N/A              | 0.773      | 0.824     | 0.723     | 0.558      | 0.773      |
|                   | LR                | 10               | 0.760      | 0.738     | 0.782     | 0.525      | 0.811      |
|                   | MLP               | 50               | 0.838      | 0.859     | 0.816     | 0.682      | 0.895      |
|                   | NB                | N/A              | 0.562      | 0.953     | 0.172     | 0.205      | 0.798      |
|                   | RF                | 100              | 0.826      | 0.859     | 0.793     | 0.659      | 0.900      |
|                   | XGB               | 300              | 0.809      | 0.855     | 0.762     | 0.625      | 0.885      |
| AAI               | DT                | N/A              | 0.781      | 0.891     | 0.672     | 0.576      | 0.788      |
|                   | ETree             | 500              | 0.883      | 0.875     | 0.891     | 0.766      | 0.952      |
|                   | KNN               | N/A              | 0.844      | 0.859     | 0.828     | 0.688      | 0.844      |
|                   | LR                | 1                | 0.805      | 0.859     | 0.750     | 0.613      | 0.855      |
|                   | MLP               | 100              | 0.875      | 0.844     | 0.906     | 0.751      | 0.916      |
|                   | NB                | N/A              | 0.695      | 0.656     | 0.734     | 0.392      | 0.789      |
|                   | RF                | 100              | 0.867      | 0.891     | 0.844     | 0.735      | 0.943      |
|                   | XGB               | 100              | 0.906      | 0.938     | 0.875     | 0.814      | 0.960      |

**Table S5.** Independent test results of ML-based classifiers built eight ML methods with three feature descriptors.

| <b>Descriptor</b> | <b>Classifier</b> | <b>Parameter</b> | <b>ACC</b> | <b>Sn</b> | <b>Sp</b> | <b>MCC</b> | <b>AUC</b> |
|-------------------|-------------------|------------------|------------|-----------|-----------|------------|------------|
| AAC               | DT                | N/A              | 0.844      | 0.906     | 0.781     | 0.693      | 0.842      |
|                   | ETree             | 50               | 0.906      | 0.906     | 0.906     | 0.813      | 0.958      |
|                   | KNN               | N/A              | 0.844      | 0.891     | 0.797     | 0.691      | 0.844      |
|                   | LR                | 100              | 0.828      | 0.875     | 0.781     | 0.659      | 0.867      |
|                   | MLP               | 300              | 0.867      | 0.891     | 0.844     | 0.735      | 0.919      |
|                   | NB                | N/A              | 0.648      | 0.938     | 0.359     | 0.364      | 0.848      |
|                   | RF                | 500              | 0.898      | 0.906     | 0.891     | 0.797      | 0.950      |
|                   | XGB               | 100              | 0.883      | 0.891     | 0.875     | 0.766      | 0.932      |
| PAAC              | DT                | N/A              | 0.813      | 0.844     | 0.781     | 0.626      | 0.819      |
|                   | ETree             | 300              | 0.906      | 0.891     | 0.922     | 0.813      | 0.957      |
|                   | KNN               | N/A              | 0.820      | 0.859     | 0.781     | 0.643      | 0.820      |
|                   | LR                | 10               | 0.766      | 0.766     | 0.766     | 0.531      | 0.863      |
|                   | MLP               | 50               | 0.891      | 0.906     | 0.875     | 0.782      | 0.947      |
|                   | NB                | N/A              | 0.586      | 0.984     | 0.188     | 0.284      | 0.868      |
|                   | RF                | 100              | 0.859      | 0.844     | 0.875     | 0.719      | 0.935      |
|                   | XGB               | 300              | 0.805      | 0.797     | 0.813     | 0.609      | 0.907      |
| AAI               | DT                | N/A              | 0.758      | 0.797     | 0.718     | 0.522      | 0.762      |
|                   | ETree             | 500              | 0.838      | 0.816     | 0.860     | 0.680      | 0.899      |
|                   | KNN               | N/A              | 0.793      | 0.840     | 0.747     | 0.599      | 0.794      |
|                   | LR                | 1                | 0.762      | 0.770     | 0.754     | 0.527      | 0.827      |
|                   | MLP               | 100              | 0.828      | 0.840     | 0.817     | 0.660      | 0.884      |
|                   | NB                | N/A              | 0.678      | 0.585     | 0.770     | 0.363      | 0.699      |
|                   | RF                | 100              | 0.812      | 0.801     | 0.824     | 0.629      | 0.897      |
|                   | XGB               | 100              | 0.830      | 0.820     | 0.840     | 0.666      | 0.907      |

- [1] K. C. Chou, "Prediction of protein cellular attributes using pseudo-amino acid composition," *Proteins: Structure, Function, and Bioinformatics*, vol. 43, no. 3, pp. 246-255, 2001.
